# Supplementary material
Source: HighWire-hosted journal article supplement (http://www.cmaj.ca/highwire/filestream/75762/field_highwire_adjunct_files/2/190883-res-3-at.pdf)
Supplement: 190883-res-3-at.pdf [file 190883-res-3-at.pdf]

### **Appendix 3 (as supplied by the authors): Identification algorithms of maternal medical conditions**

#### **Mood and anxiety disorders** (within 3 years before index date):

- ✓ One or more hospitalizations with a diagnosis for depressive disorder, affective psychoses, neurotic depression or adjustment reaction: ICD-9-CM codes 296.1-296.8, 300.4, 309 or 311; ICD-10-CA codes F31, F32, F33, F34.1, F38.0, F38.1, F41.2, F43.1, F43.2, F43.8, F53.0, F93.0 or with a diagnosis for an anxiety state, phobic disorders or obsessive-compulsive disorders: ICD-9-CM codes 300.0, 300.2, 300.3, 300.7; ICD-10-CA codes F40, F41.0, F41.1, F41.3, F41.8, F41.9, F42, F45.2, OR
- ✓ One or more hospitalizations with a diagnosis for anxiety disorders: ICD-9-CM code 300; ICD-10-CA codes F32, F34.1, F40, F41, F42, F44, F45.0, F45.1, F45.2, F48, F68.0, or F99 AND one or more prescriptions for an antidepressant or mood stabilizer, including medications with the ATC codes N05AN01, N05BA, N06A, OR
- ✓ One or more physician visits with a diagnosis for depressive disorder or affective psychoses: ICD-9-CM codes 296, 311, OR
- ✓ One or more physician visits with a diagnosis for anxiety disorders: ICD-9-CM code 300 AND one or more prescriptions for an antidepressant or mood stabilizer, including medications with the ATC codes N05AN01, N05BA, N06A, OR
- ✓ Three or more physician visits with a diagnosis for anxiety disorders or adjustment reaction: ICD-9-CM code 300, 309.

#### **Developmental disability** (any time before index date):

- ✓ One or more hospitalizations with diagnoses for autism spectrum disorder (ASD), attention deficit/hyperactivity disorder (ADHD) or intellectual disabilities: ICD-9-CM codes 299, 314, 317, 318, 319; ICD-10-CA: F70, F71, F72, F73, F78, F79, F84, F90.
- ✓ One or more physician visit with diagnoses for ASD, ADHD or intellectual disabilities: ICD-9-CM: 299, 314, 317, 318, 319

**Asthma** (within 1 year before index date):

- ✓ One or more hospitalizations with a diagnosis of asthma: ICD-9-CM codes 493; ICD-10-CA code J45, OR
- ✓ One or more physician visits with a diagnosis of asthma: ICD-9-CM codes 493, OR
- ✓ One or more prescriptions for asthma medication (ATC: R03, R06AX17)

Abbreviations: ICD-10-CA, The International Classification of Disease, Tenth Revision, Canada; ICD-9-CM, The International Classification of Disease, Ninth revision, Clinical Modifications; ATC, The Anatomical Therapeutic Chemical
